# Supplementary material for: Voltage-Gated Sodium Channels as Potential Biomarkers and Therapeutic Targets for Epithelial Ovarian Cancer
Source: MDPI journal article supplement (doi:10.3390/cancers13215437), 2021-10-29
Supplement: s1 [file s1]

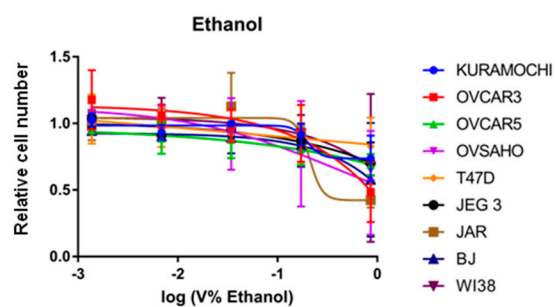

**Figure S1.** Dose response curves for ethanol control. Cells were treated with isovolumetric percentages of ethanol compared to volumes of local anesthetics utilized in the dose response experiments.

**Table S1.** IC<sub>50</sub><sup>a</sup> values for local anesthetics by cell line

|                 |           | Local Anesthetic      |                       |                       |
|-----------------|-----------|-----------------------|-----------------------|-----------------------|
|                 |           | Lidocaine             | Bupivacaine           | Procaine              |
| Tissue type     | Cell Line | IC <sub>50</sub> (mM) | IC <sub>50</sub> (mM) | IC <sub>50</sub> (mM) |
| Ovarian cancer  | KURAMOCHI | 7.56                  | 2.16                  | NR <sup>b</sup>       |
| Ovarian cancer  | OVCAR3    | 5.56                  | 1.35                  | 24.44                 |
| Ovarian cancer  | OVCAR5    | 6.01                  | NR                    | 10.34                 |
| Ovarian cancer  | OVSAHO    | 6.59                  | 0.81                  | 3.12                  |
| Breast cancer   | T47D      | 5.56                  | NR                    | 3.24                  |
| Choriocarcinoma | JEG 3     | 4.18                  | 3.14                  | 3.53                  |
| Choriocarcinoma | JAR       | 3.50                  | 0.58                  | 3.05                  |
| Fibroblast      | BJ        | 11.38                 | 0.96                  | 8.04                  |
| Fibroblast      | WI38      | 5.44                  | 3.16                  | 10.71                 |

<sup>a</sup> IC<sub>50</sub> – Half maximal inhibitory concentration

<sup>b</sup>NR – not reached

<sup>c</sup> – IC<sub>50</sub> values for benzocaine not reached
